# Supplementary material for: Insights into Anti-Inflammatory Activity and Internalization Pathway of Onion Peel-Derived Gold Nano Bioconjugates in RAW 264.7 Macrophages
Source: PubMed Central journal article supplement — ACS Omega. 2022 Feb 22;7(9):7606–15. doi: 10.1021/acsomega.1c06131 (PMC8908513; doi:10.1021/acsomega.1c06131), 2022-02-22
Supplement: ao1c06131_si_001.pdf [file ao1c06131_si_001.pdf]

# Insight into Anti-inflammatory activity and internalization pathway of onion peel derived gold nano bioconjugate in RAW 264.7 macrophages

*Kabyashree Phukan<sup>‡</sup>, Rajlakshmi Devi<sup>†\*</sup>, and Devasish Chowdhury<sup>‡\*</sup>*

<sup>‡</sup>Material Nanochemistry Laboratory, Physical Sciences Division, <sup>†</sup>Life Sciences Division,

Institute of Advanced Study in Science and Technology, Paschim Boragaon, Garchuk,

Guwahati-781035, Assam, India.

## Supporting Information

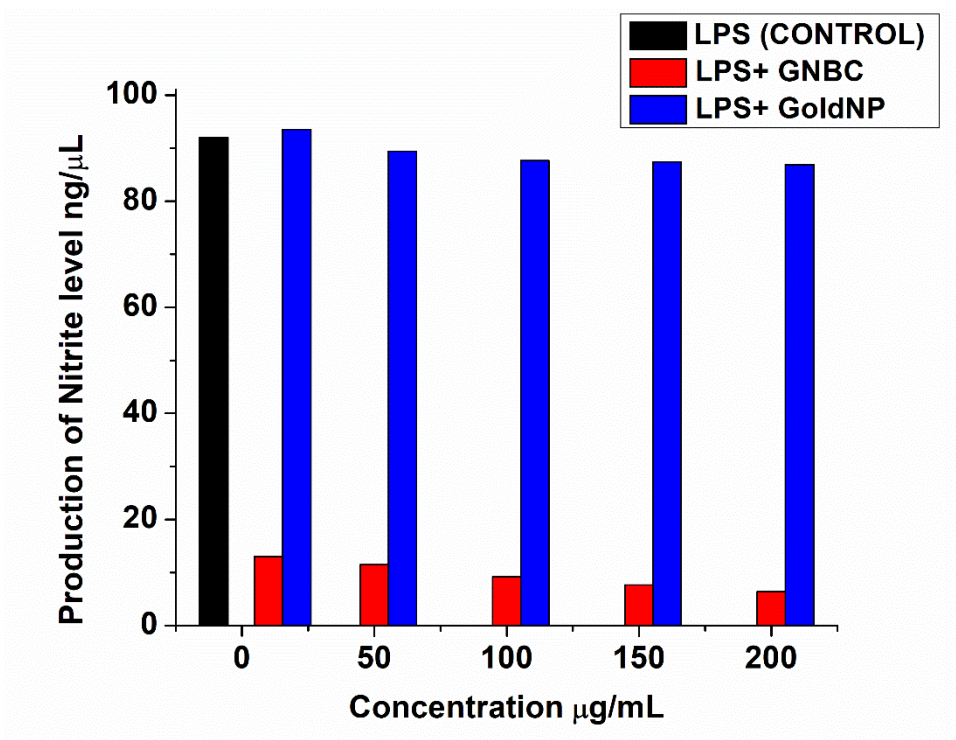

**Figure S1:** Comparison of Nitrite production assay in LPS treated RAW cells by GNBC and Gold NPs.

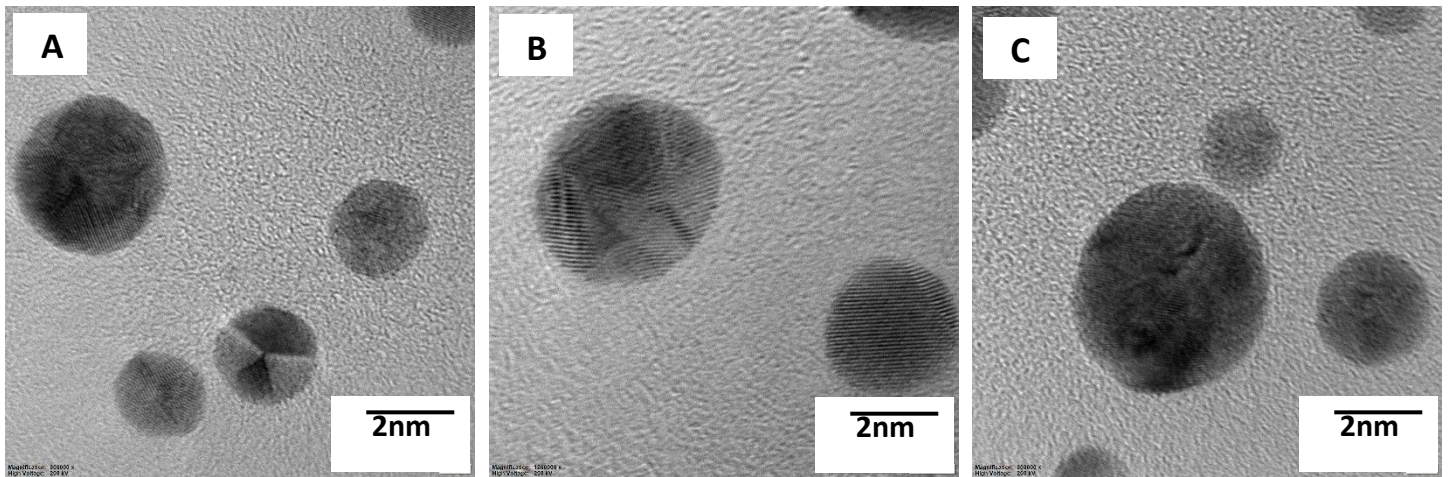

**Figure S2(A-C):** TEM analysis of GNBC during different periods of interval. A, B and C represents 30 days 60 days, and 120 days respectively.

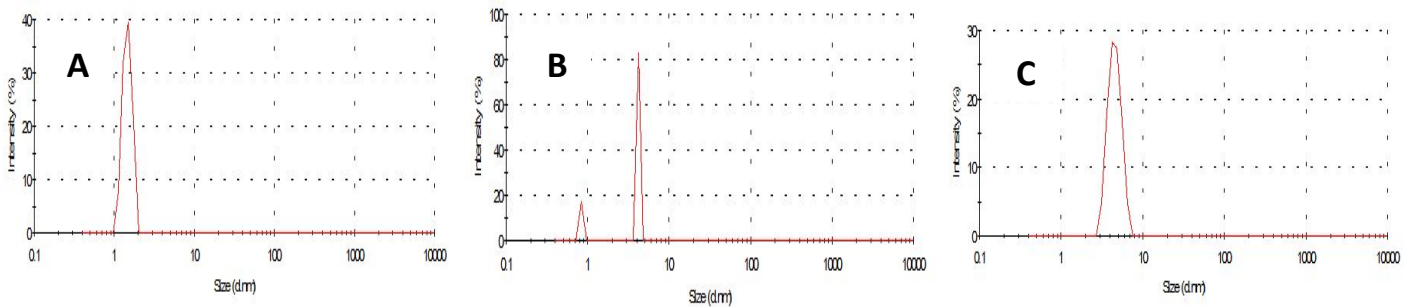

**Figure S3(A-C):** DLS analysis of GNBC during different periods of interval. A, B and C represents 30 days 60 days, and 120 days respectively.

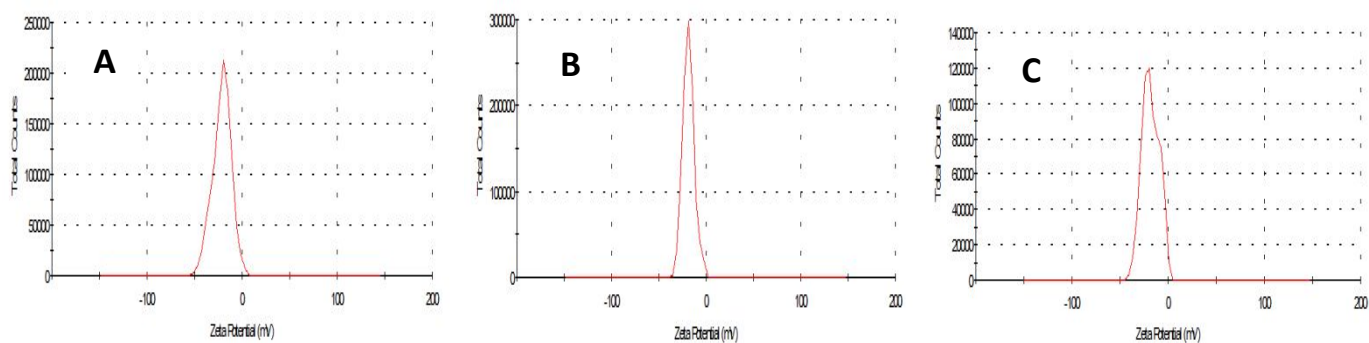

**Figure S4(A-C):** Zeta Potential analysis of GNBC during different periods of interval. A, B and C represents 30 days 60 days, and 120 days respectively.
